# Supplementary material for: miRNomes of haematopoietic stem cells and dendritic cells identify miR-30b as a regulator of Notch1
Source: PubMed Central journal article supplement — Nat Commun. 2013 Dec 6;4:2903. doi: 10.1038/ncomms3903 (PMC3863901; doi:10.1038/ncomms3903), 2013-12-06
Supplement: ncomms3903-s1.pdf [file ncomms3903-s1.pdf]

**Supplementary Table S1. miRNAs with different expression levels were tested by qRT-PCR.**

| Average expression level(TPM) | miRNA_Name   | HSCs(TPM) | imDCs(TPM) | maDCs(TPM) | DCregs(TPM) | Average(TPM) | qRT-PCR correlated with sequencing |
|-------------------------------|--------------|-----------|------------|------------|-------------|--------------|------------------------------------|
| >5000                         | mmu-let-7d   | 50438.9   | 34331.7    | 69669.4    | 44473.7     | 49728.4      | No                                 |
|                               | mmu-miR-29a  | 31269.9   | 48046      | 54571.2    | 57230.4     | 47779.4      | yes                                |
|                               | mmu-miR-191  | 61246.3   | 31608.4    | 27120.4    | 7052.2      | 31756.8      | No                                 |
|                               | mmu-miR-378  | 25858.1   | 54156      | 10968.9    | 4643.2      | 23906.6      | Yes                                |
|                               | mmu-miR-185  | 21263.7   | 16915      | 19344.1    | 16414.1     | 18484.2      | Yes                                |
|                               | mmu-miR-25   | 31966.5   | 11013.9    | 4262.9     | 3156.7      | 12600.0      | Yes                                |
|                               | mmu-miR-192  | 8391.9    | 7746.2     | 5836.8     | 4531.3      | 6626.6       | Yes                                |
|                               | mmu-miR-103  | 6612.6    | 10521.9    | 6243.7     | 2487.6      | 6466.5       | Yes                                |
|                               | mmu-miR-23a  | 3826.4    | 11000.8    | 3697.6     | 4120.8      | 5661.4       | Yes                                |
| 1000-5000                     | mmu-miR-340  | 7225.2    | 7002.6     | 2785.3     | 1406.5      | 4604.9       | Yes                                |
|                               | mmu-miR-744  | 4970.1    | 8703.9     | 2491.3     | 1683.5      | 4462.2       | No                                 |
|                               | mmu-miR-30d  | 4134.7    | 4324.1     | 2058.5     | 3021.7      | 3384.8       | Yes                                |
|                               | mmu-miR-93   | 5856.7    | 4919.8     | 425        | 266         | 2866.9       | Yes                                |
|                               | mmu-miR-210  | 150.2     | 4955       | 2629.6     | 2409.8      | 2536.2       | Yes                                |
|                               | mmu-miR-451  | 9189.3    | 16         | 0.4        | 1.1         | 2301.7       | Yes                                |
|                               | mmu-miR-503  | 4229.8    | 1946.1     | 863.1      | 928.5       | 1991.9       | Yes                                |
|                               | mmu-miR-101a | 2396.1    | 1057.3     | 1400.9     | 1639.4      | 1623.4       | Yes                                |
|                               | mmu-miR-155  | 47.6      | 2608.8     | 2651.4     | 140.9       | 1362.2       | Yes                                |
|                               | mmu-miR-22   | 436.3     | 2332.1     | 1121.6     | 1340.1      | 1307.5       | Yes                                |
|                               | mmu-miR-181d | 3684.6    | 764.2      | 345.9      | 168.7       | 1240.9       | Yes                                |
|                               | mmu-miR-144  | 4328.2    | 1          | 0.4        | 0.4         | 1082.5       | Yes                                |

|          |                 |       |        |       |        |       |     |
|----------|-----------------|-------|--------|-------|--------|-------|-----|
|          | mmu-miR-98      | 856.7 | 1460.5 | 819.1 | 346.3  | 870.7 | Yes |
|          | mmu-miR-17      | 875.4 | 670.9  | 535.6 | 227.4  | 577.3 | Yes |
|          | mmu-miR-31      | 33.1  | 12.6   | 34.9  | 1738.1 | 454.7 | Yes |
|          | mmu-miR-130a    | 372.4 | 18.3   | 30.4  | 1085.9 | 376.8 | Yes |
| 100-1000 | mmu-miR-147     | 28.2  | 745.2  | 589   | 82.2   | 361.2 | Yes |
|          | mmu-miR-132     | 14.4  | 455.3  | 373.6 | 67.9   | 227.8 | Yes |
|          | mmu-miR-125a-5p | 45.4  | 50.8   | 107.7 | 423    | 156.7 | Yes |
|          | mmu-miR-34c     | 4.3   | 127.4  | 236.6 | 202.1  | 142.6 | No  |
|          | mmu-miR-99a     | 175.3 | 29.7   | 8.3   | 344.8  | 139.5 | Yes |
|          | mmu-miR-486     | 448.8 | 4.4    | 4.5   | 1.5    | 114.8 | Yes |
| 10-100   | mmu-miR-10b     | 15.4  | 1.9    | 7.4   | 55.4   | 20.0  | Yes |

Abbreviations: TPM, transcripts per million; HSCs, hematopoietic stem cells; imDCs, immature dendritic cells; maDCs, mature dendritic cells; DCregs, regulatory dendritic cells.

**Supplementary Table S2. Novel predicted miRNAs with library counts as well as mature sequence.** 53 novel miRNA candidates were sequenced in at least two samples, 40 of them were validated by qRT-PCR in myelogenous cell line RAW cells, 24 novel miRNA candidates were up-regulated upon TSA treatment.

| Name   | Sequence (5p)          | Sequence (3p)            | Source:count(sum):count(5p):count(3p)                   | Detected by qRT-PCR in RAW cells | Up-regulation by TSA treatment in RAW cells |
|--------|------------------------|--------------------------|---------------------------------------------------------|----------------------------------|---------------------------------------------|
| DCm001 | -                      | GGGGATGTAGCTCAGATGGT     | DCreg:202:0:202 imDC:101:0:101 HSC:19:0:19 maDC:48:0:48 | yes                              | yes                                         |
| DCm002 | AAGGTGGCTGTGGTTGTTTGC  | AAAGCACCCATGGCCACT       | imDC:56:54:2 maDC:30:27:3 HSC:17:13:4 DCreg:10:6:4      | yes                              | yes                                         |
| DCm003 | CCGGGCGGGCGGGCGAGCGG   | GTGCGCGGGACTCGGGCGGGC    | imDC:12:11:0 DCreg:13:13:0 maDC:6:6:0 HSC:36:35:1       | yes                              | yes                                         |
| DCm004 | AGGAGTGAGTGGAAGCTGGTG  | -                        | maDC:16:16:0 HSC:12:12:0 imDC:49:49:0                   | yes                              | yes                                         |
| DCm005 | TGGGATCATTGTGGGAGAAGAG | -                        | maDC:16:16:0 DCreg:11:11:0 imDC:18:18:0                 | yes                              | yes                                         |
| DCm006 | AGTACCACCATACACAGCTTTT | GAGCTGGGTGTGGTGACATGC    | HSC:18:13:5 imDC:10:8:2 maDC:9:8:1                      | yes                              | yes                                         |
| DCm007 | -                      | GTCAGGATGGCCGAGCGGTCTAAG | imDC:124:0:124 maDC:204:0:204                           | yes                              | yes                                         |
| DCm008 | CGGTCTAAGCGCTGCGTTC    | -                        | HSC:77:77:0 imDC:10:10:0                                | yes                              | yes                                         |
| DCm009 | -                      | AGCCCGGGCTGGGGTGGGTGT    | maDC:19:0:19 imDC:15:0:15                               | yes                              | yes                                         |
| DCm010 | -                      | TAGGGGCTGGAAAGGTGACT     | maDC:10:0:10 HSC:19:0:19                                | yes                              | yes                                         |
| DCm011 | -                      | GTGTCTGAAGACAGCTATGATGAA | HSC:10:0:10 imDC:16:0:16                                | yes                              | yes                                         |
| DCm012 | AGGTCCGGCTGTCGCGGGCT   | AGCCCGTGGCGGCTTCAGGAC    | MDC31:6:5:1 imDC:19:18:1                                | yes                              | yes                                         |
| DCm013 | ACTGAGGAAGGAGGTGGAGG   | -                        | maDC:13:13:0 DCreg:11:11:0                              | yes                              | yes                                         |
| DCm014 | -                      | TGAAGTGGATGGAACAGGAGAGT  | imDC:8:0:8 DCreg:16:0:16                                | yes                              | yes                                         |
| DCm015 | ACCCACTCCTGGTACCATT    | -                        | HSC:11:11:0 DCreg:11:11:0                               | yes                              | yes                                         |
| DCm016 | -                      | TCTGAAAAGGTCATCGGCAGA    | imDC:5:0:5 HSC:17:0:17                                  | yes                              | yes                                         |
| DCm017 | ACTCGGGACTGGAGGGATGG   | -                        | maDC:13:12:0 HSC:8:8:0                                  | yes                              | yes                                         |
| DCm018 | -                      | TGGACCAAGTAAAAATAAAGCT   | imDC:10:0:10 maDC:9:0:9                                 | yes                              | yes                                         |
| DCm019 | -                      | AGCCCGGGGCTGCGGAGACACA   | HSC:6:0:6 imDC:11:0:10                                  | yes                              | yes                                         |
| DCm020 | GCTGACTGGGAAGGAAATGG   | GTCTCTTTCTTCGGCTCTAGT    | imDC:10:10:0 HSC:6:5:1                                  | yes                              | yes                                         |

|        |                          |                          |                                                       |     |     |
|--------|--------------------------|--------------------------|-------------------------------------------------------|-----|-----|
| DCm021 | -                        | TATATAAATATGTGTATGT      | imDC:6:0:6 HSC:5:0:5                                  | yes | yes |
| DCm022 | -                        | AGGGGACTGGCGAGACCCGAA    | HSC:6:0:6 DCreg:5:0:5                                 | yes | yes |
| DCm023 | TATATAAATATGTGTATGT      | -                        | HSC:5:5:0 imDC:5:5:0                                  | yes | yes |
| DCm024 | -                        | TGTGGAGCTCACCTATGATGGC   | maDC:5:0:5 DCreg:5:0:5                                | yes | yes |
| DCm025 | -                        | GGGGCTGGAAGGATGGCTCAGT   | maDC:73:0:73 HSC:21:0:21 imDC:205:0:205 DCreg:18:0:18 | yes | no  |
| DCm026 | -                        | GGCTGGTCCGAAGGTAGTGAGTT  | maDC:52:0:52 imDC:68:0:68 HSC:101:0:101 DCreg:53:0:53 | yes | no  |
| DCm027 | -                        | TGACTCTGTACATGGCATTAT    | HSC:52:0:52 DCreg:33:0:33 maDC:39:0:39 imDC:31:0:31   | yes | no  |
| DCm028 | -                        | GATGGAGAGATTTCAGCGGT     | HSC:9:0:9 DCreg:7:0:7 imDC:21:0:21 maDC:23:0:23       | yes | no  |
| DCm029 | -                        | AGAGGACAAGCATGCACTTTT    | DCreg:11:0:11 maDC:47:0:47 imDC:46:0:46               | yes | no  |
| DCm030 | ACTCTCTCACTCTGCATGGTAC   | TGACTTTCGTACGGAGAGAGAG   | imDC:11:9:2 HSC:10:10:0 maDC:6:6:0                    | yes | no  |
| DCm031 | -                        | TAGGATTTGCTGAAGGAGGCAA   | imDC:5:0:5 DCreg:7:0:7 HSC:13:0:13                    | yes | no  |
| DCm032 | -                        | TCAGATGTGTGCAGAGTCCAA    | maDC:8:0:8 imDC:11:0:11 DCreg:5:0:5                   | yes | no  |
| DCm033 | -                        | TACGTACACACTCGGACGCACA   | imDC:38:0:38 HSC:21:0:21                              | yes | no  |
| DCm034 | CAGGTCTGTAATCTTGGTGGTCGA | GTTCACTGTAAGGGCGGACCGACA | maDC:11:11:0 HSC:17:17:0                              | yes | no  |
| DCm035 | AAGGGCCCAGCACTCTCCAGAG   | CCTGGGAGTTCAGGGACCCTGGA  | imDC:19:5:14 maDC:8:0:8                               | yes | no  |
| DCm036 | -                        | TCCGGCTGGGGTAGCAGTAG     | imDC:14:0:14 maDC:11:0:11                             | yes | no  |
| DCm037 | AGCTGGCCAGATGGTAGTTCT    | AACTTCTATCCTGACCCGCTGA   | imDC:11:10:1 maDC:11:10:1                             | yes | no  |
| DCm038 | -                        | ATGGTGATGGAGATGATGGTGA   | imDC:9:0:9 maDC:10:0:10                               | yes | no  |
| DCm039 | -                        | TCGGCGAGGCCCGGAGGACAG    | DCreg:5:0:5 imDC:13:0:13                              | yes | no  |
| DCm040 | TGTAGAAGGAAGGGCTGCTGT    | -                        | DCreg:5:5:0 imDC:10:10:0                              | yes | no  |
| DCm041 | TCTGGGGCTTGTGTGGTAG      | -                        | maDC:14:14:0 imDC:21:21:0 HSC:22:22:0                 | no  |     |
| DCm042 | -                        | CCAGGAGTAGTGGCACTATCT    | maDC:10:0:10 HSC:9:0:9 imDC:17:0:17                   | no  |     |
| DCm043 | -                        | CCAGAGTGGACGGAACACCGA    | maDC:13:0:13 imDC:8:0:8 HSC:4:0:4                     | no  |     |
| DCm044 | GAGCCATCTCTAGCCCTGA      | AGGGACTGCAGAGATGGCACTG   | imDC:8:1:7 maDC:5:0:5 HSC:5:1:4                       | no  |     |
| DCm045 | TAGGTAGACCAGGCTGATCT     | -                        | imDC:15:15:0 HSC:13:13:0                              | no  |     |
| DCm046 | -                        | TGTGTTGGACAGGTAAGTGTAT   | maDC:6:0:6 imDC:17:0:17                               | no  |     |
| DCm047 | ACGGAGACAGAAGGAAGTTGCC   | -                        | maDC:9:9:0 imDC:13:12:0                               | no  |     |
| DCm048 | CGGGAGGCTGAGACAGGAGGA    | -                        | DCreg:12:12:0 HSC:9:9:0                               | no  |     |

|        |                       |                        |                         |    |
|--------|-----------------------|------------------------|-------------------------|----|
| DCm049 | TGCGGAGCGTGGACACGGTCT | -                      | DCreg:5:5:0 HSC:14:14:0 | no |
| DCm050 | TCATCAAGTCTGGCTCTTTTT | ATGAGCCAGGTTGGTGGCT    | maDC:5:5:0 imDC:11:10:1 | no |
| DCm051 | AACTACCACCTCTGGCCTTT  | AAGTCCAGGAGGTGGTAGTA   | maDC:6:0:6 HSC:9:1:8    | no |
| DCm052 | AAGTGAAAGCCAGCTGAGA   | -                      | maDC:5:5:0 imDC:8:8:0   | no |
| DCm053 | -                     | TTGTGAGGAGCTGAAGAGTGGT | HSC:8:0:8 maDC:5:0:5    | no |

---

Abbreviations: HSC, hematopoietic stem cell; imDC, immature dendritic cell; maDC, mature dendritic cell; DCreg, regulatory dendritic cell; TSA, Trichostatin A.
